# Supplementary material for: Selenium-enrichedBifidobacterium longumDD98 relieves irritable bowel syndrome induced by chronic unpredictable mild stress in mice
Source: Royal Society of Chemistry journal article supplement (doi:10.1039/d2fo03408e), 2023-01-01
Supplement: d2fo03408e1.pdf [file d2fo03408e1.pdf]

## Supplementary Information

### Preparation of Se-*B. longum* DD98

The *B. longum* DD98 strain was isolated from the feces of a healthy human subject and was further selected using high-throughput screening. The selected strain DD98 was held in long-term preservation in the China General Microbiological Culture Collection Center (accession number GCMCC16573). The culture of *B. longum* DD98 in 20% glycerol was transferred twice to fresh Reinforced Clostridium Medium (RCM) broth for recovery and proliferation, and then incubated anaerobically at 37°C at a constant pH of 6.8 in a 6-L fermenter. After 9-11 hours of incubation when the bacteria reached the logarithmic growth stage, Na<sub>2</sub>SeO<sub>3</sub> was added dropwise to the medium. The addition of Na<sub>2</sub>SeO<sub>3</sub> from the beginning inhibited the proliferation of bacteria. The incubation continued for a total of 24 hours. The final concentration of Na<sub>2</sub>SeO<sub>3</sub> in the medium was 18.5 µg/mL. This Na<sub>2</sub>SeO<sub>3</sub> concentration was used, as bacteria grown with 18.5 µg/mL of Na<sub>2</sub>SeO<sub>3</sub> showed greater ability of accumulating Se and transforming Na<sub>2</sub>SeO<sub>3</sub> to more bioactive forms of Se in protein. The growth of bacteria was monitored using optical density (OD at 600 nm) and plate counts (CFU/mL) as well as the amount of NaOH added during fermentation (mL). At the end of fermentation, bacterial cells were harvested, washed, and then freeze-dried for subsequent studies.

**Table. S1** Primers used for the RT-qPCR analyses

| Gene     | Forward Sequence (5'-3') | Reversed Sequence (5'-3') |
|----------|--------------------------|---------------------------|
| IL-1β    | AGCTTCAAATCTCGCAGCAG     | TCTCCACAGCCACAATGGA       |
| IL-6     | TAGTCCTTCCTACCCCAATTTCC  | TTGGTCCTTAGCCACTCCTTC     |
| TNF-α    | AGGCACTCCCCAAAAGAT       | CAGTAGACAGAAGAGCGTGGTG    |
| COX-2    | CCCATTAGCAGCCAGTTGTC     | CAGGATGCAGTGCTGAGTTC      |
| Occludin | TTCCTCTGACCTTGAGTGTGG    | CTCTTGCCCTTTCCTGCTTT      |
| ZO-1     | GCCGCTAAGAGCACAGCAA      | GCCCTCCTTTTAACACATCAGA    |
| β-actin  | AGTGTGACGTTGACATCCGT     | GCAGCTCAGTAACAGTCCGC      |

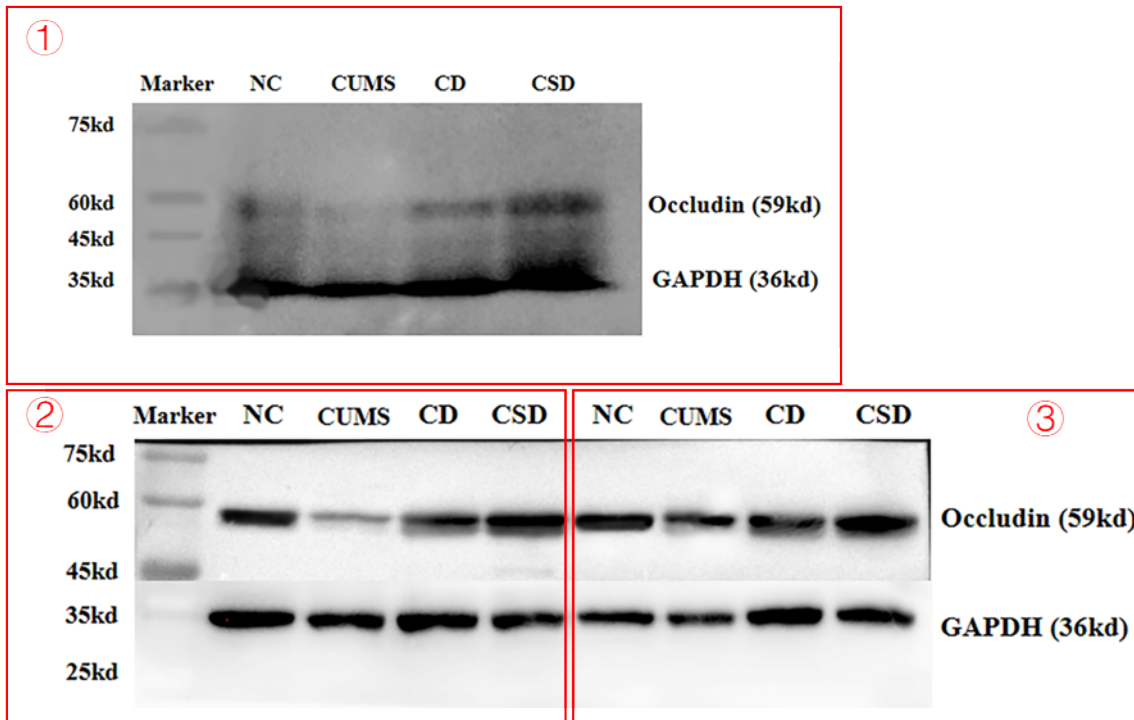

**Fig. S1** Western blot analysis of occludin level in mice colon. NC, normal control group; CUMS, chronic unpredictable mild stress group; CD, CUMS + *B. longum* DD98 group; CSD, CUMS + *Se-B. longum* DD98 group

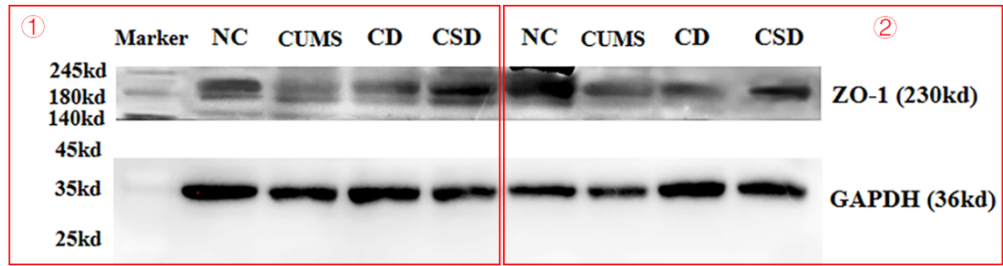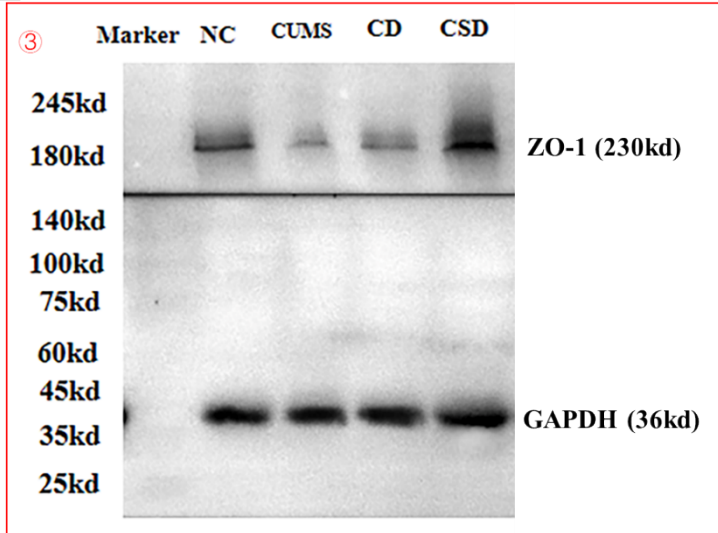

**Fig. S2** Western blot analysis of ZO-1 level in mice colon. NC, normal control group; CUMS, chronic unpredictable mild stress group; CD, CUMS + *B. longum* DD98 group; CSD, CUMS + *Se-B. longum* DD98 group.

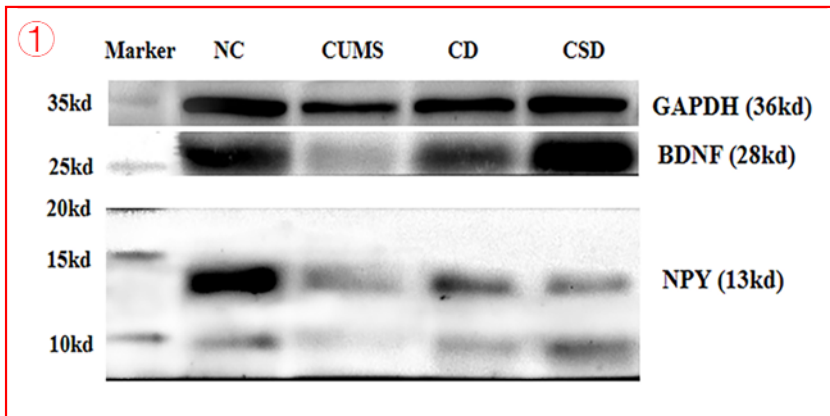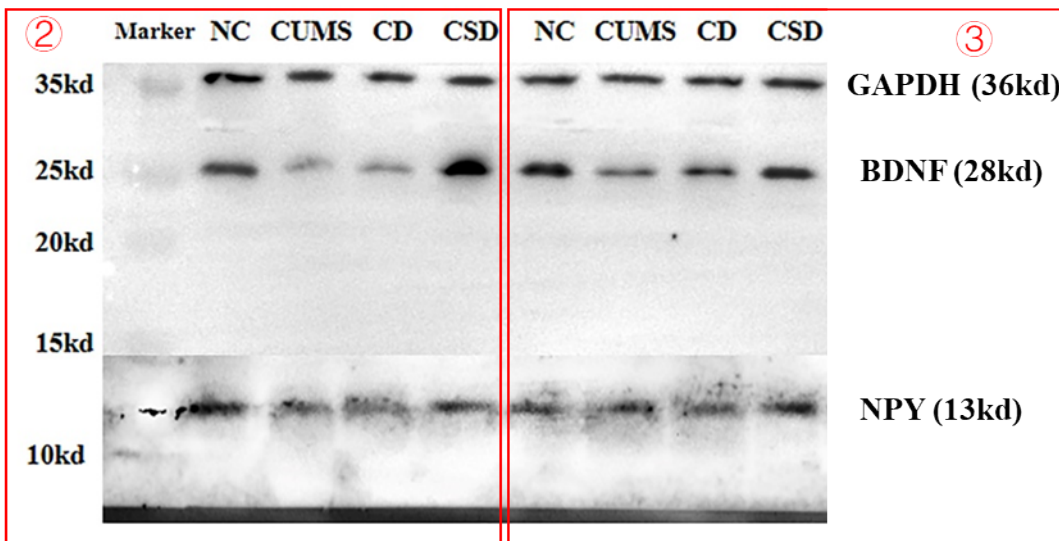

**Fig. S3** Western blot analysis of BDNF and NPY level in mice cortex. NC, normal control group; CUMS, chronic unpredictable mild stress group; CD, CUMS + *B. longum* DD98 group; CSD, CUMS + *Se-B. longum* DD98 group; BDNF, brain-derived neurotrophic factor; NPY, neuropeptide Y.
